# Supplementary material for: Isolation and identification of a halophilic and alkaliphilic microalgal strain
Source: PeerJ journal article supplement (doi:10.7717/peerj.7189), 2019-06-24

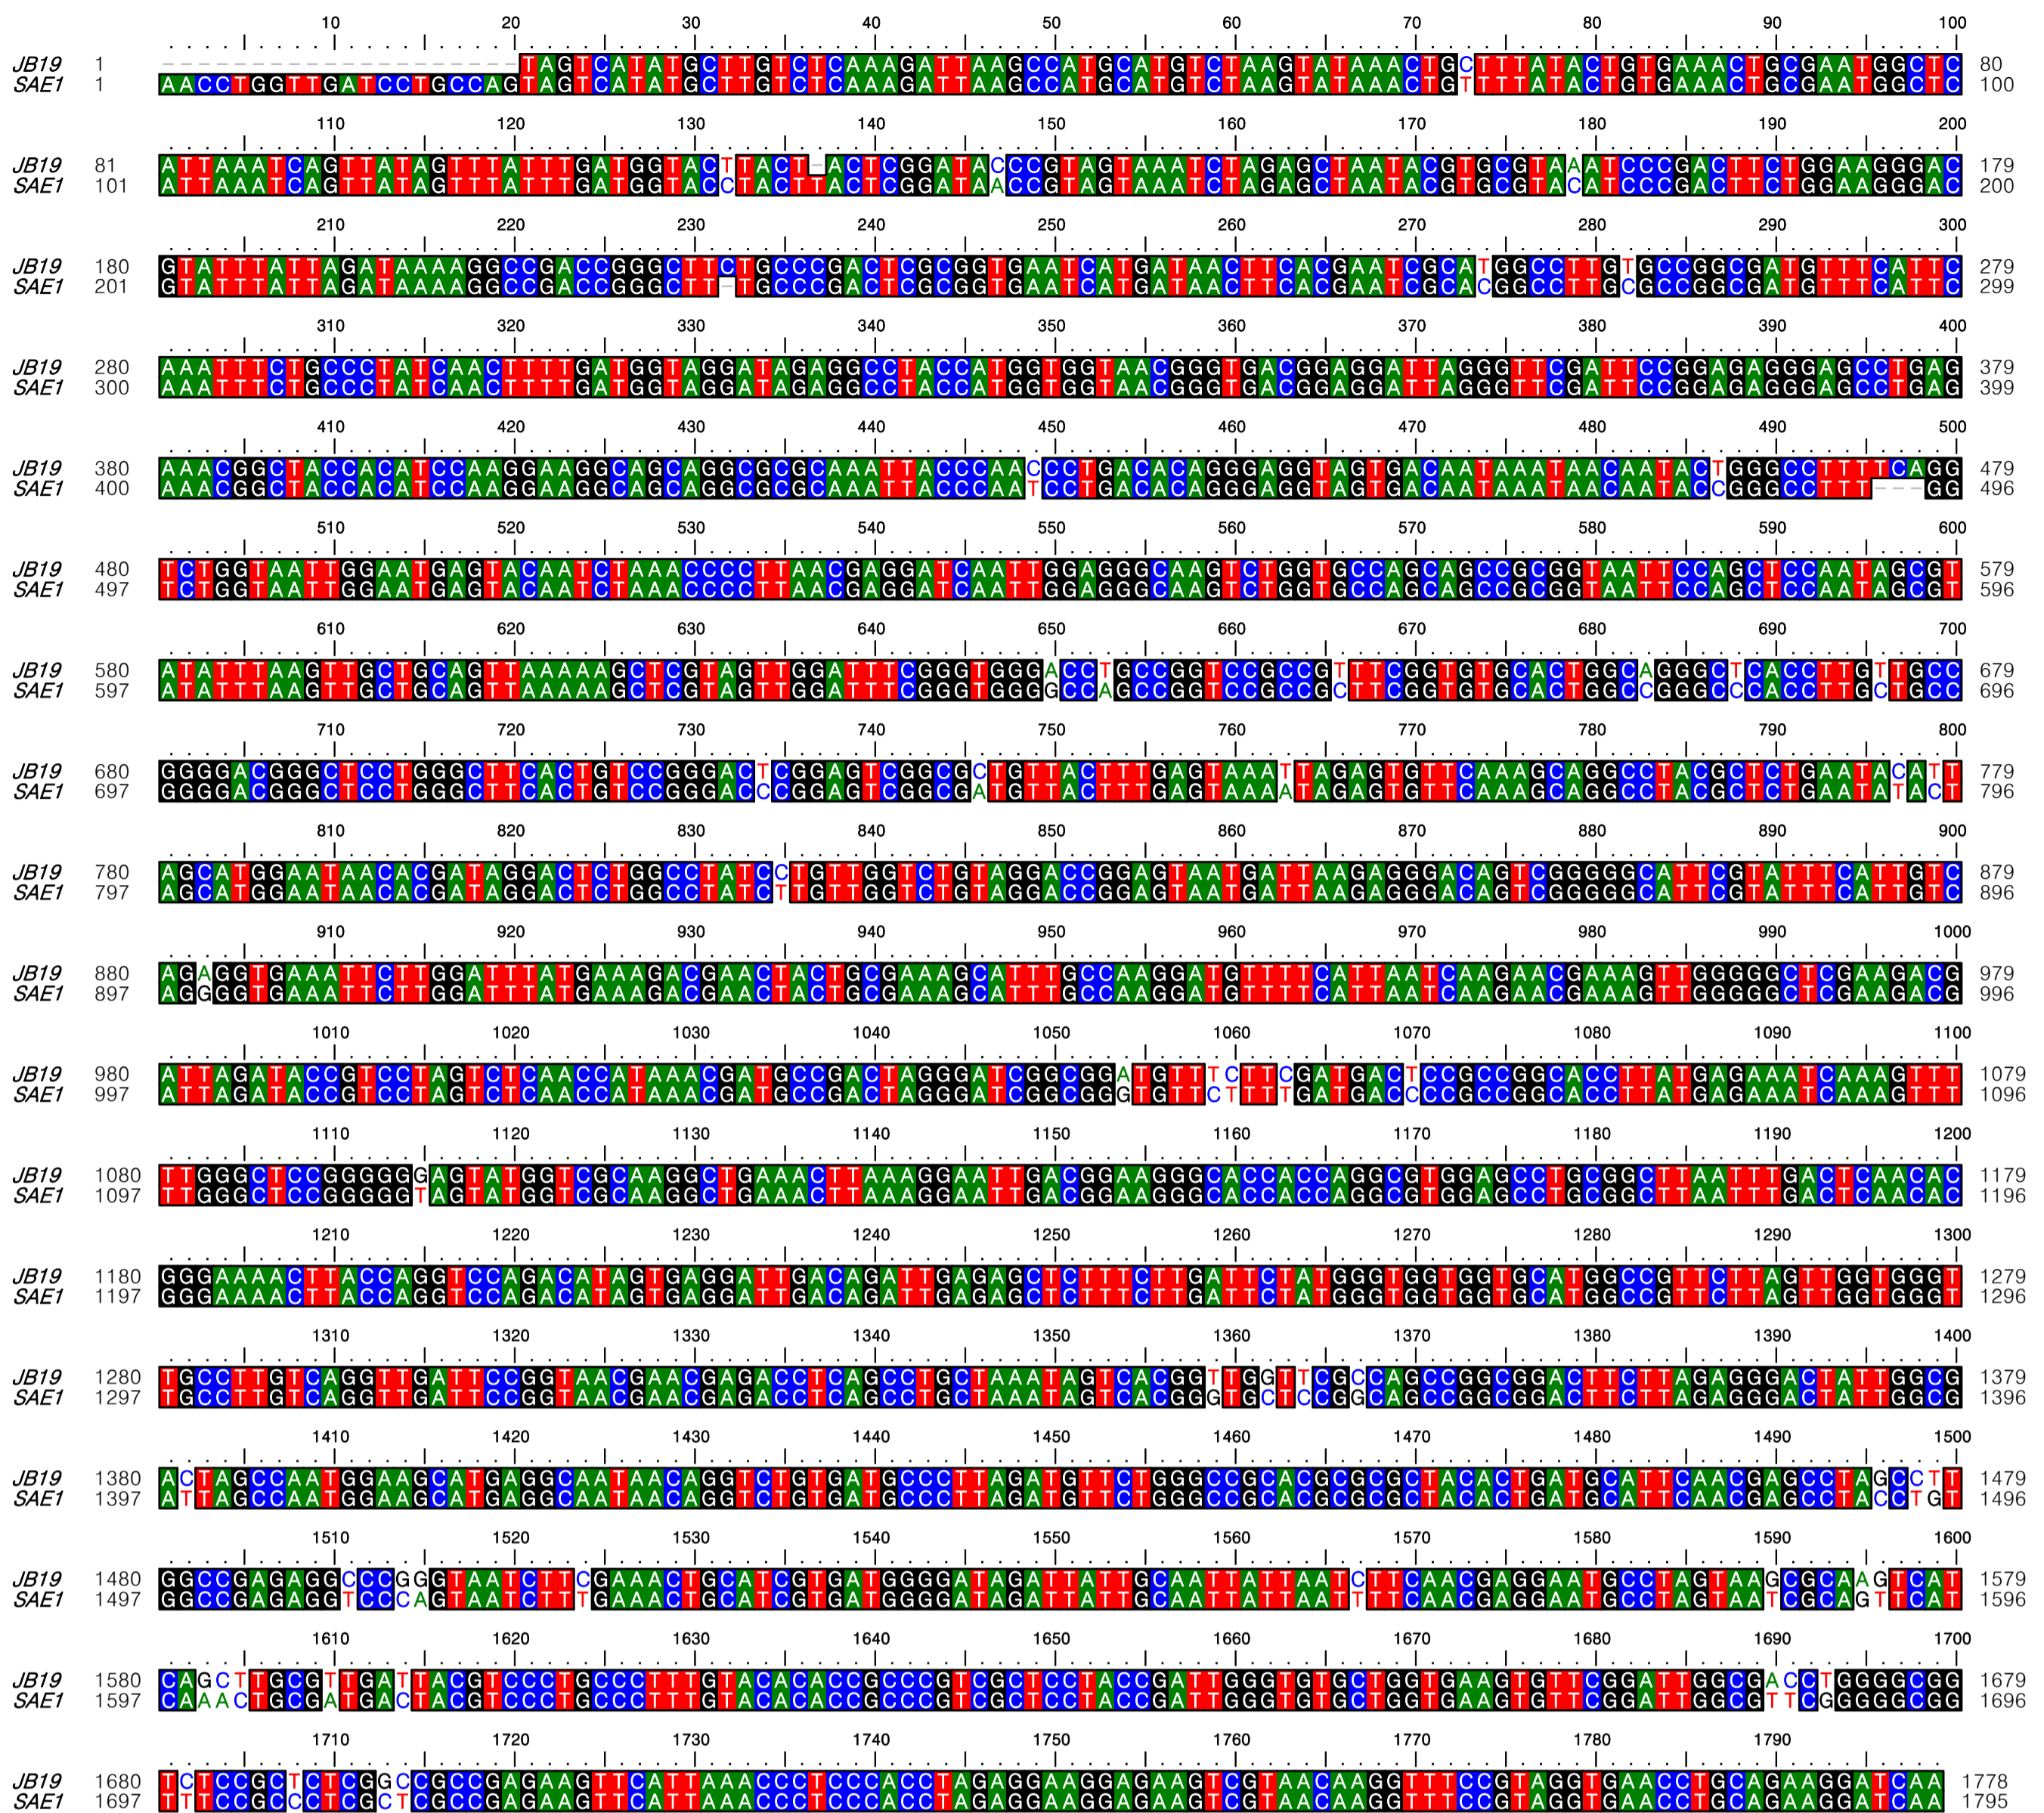

Supplement: S1.pdf [file S1.pdf]
