# Supplementary material for: Isolation and identification of a halophilic and alkaliphilic microalgal strain
Source: PeerJ. 2019 Jun 24;7:e7189. doi: 10.7717/peerj.7189 (PMC6596407; doi:10.7717/peerj.7189)
Supplement: Supplemental Information 5 — The biomass of microalgae growing in different concentrations of NaHCO3 (the value of ODλ=700). Each microalgae sample had three independent replicate cultures. [file peerj-07-7189-s005.xls]

## Sheet: Sheet1
		NaHCO3
		0mM	0.107	0.106	0.107
		50mM	0.761	0.76	0.751
		100mM	0.934	0.932	0.933
		200mM	1.158	1.155	1.152
		300mM	1.271	1.273	1.271
		400mM	1.283	1.284	1.283
		500mM	1.269	1.264	1.266
