# Supplementary material for: Isolation and identification of a halophilic and alkaliphilic microalgal strain
Source: PeerJ. 2019 Jun 24;7:e7189. doi: 10.7717/peerj.7189 (PMC6596407; doi:10.7717/peerj.7189)
Supplement: Supplemental Information 6 — The biomass of microalgae growing in different concentrations of NaCl (the value of ODλ=700). Each microalgae sample had three independent replicate cultures. [file peerj-07-7189-s006.xls]

## Sheet: Sheet1
	NaCl
	0mM	0.107	0.106	0.107
	100mM	0.128	0.133	0.13
	200mM	0.198	0.201	0.2
	400mM	0.153	0.148	0.15
	600mM	0.141	0.14	0.135
	800mM	0.101	0.101	0.101
	1000mM	0.045	0.044	0.045
